# Supplementary material for: F-actin-based extensions of the head cyst cell adhere to the maturing spermatids to maintain them in a tight bundle and prevent their premature release in Drosophila testis
Source: PubMed Central journal article supplement (PMC2683793; doi:10.1186/1741-7007-7-19), 2009-05-05

Supplemental Figure 1: Gal4 expression patterns in the *Drosophila* testis.

*pCOGGal4 UAS-Myosin VIIa:GFP/Y; UAS-mRFP1/+*

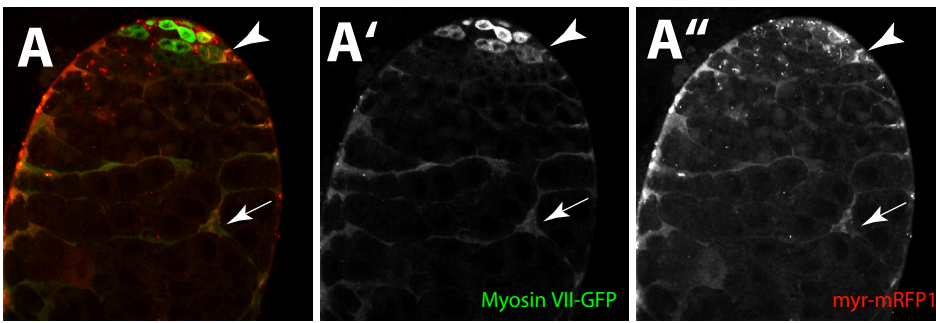

*pCOGGal4/Y; UAS-actin:GFP/+*

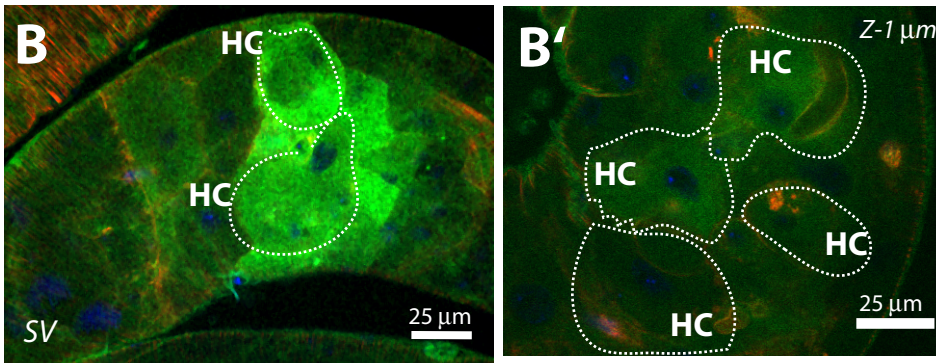

*SG18.1 UAS-GFP/UAS-actinGFP*

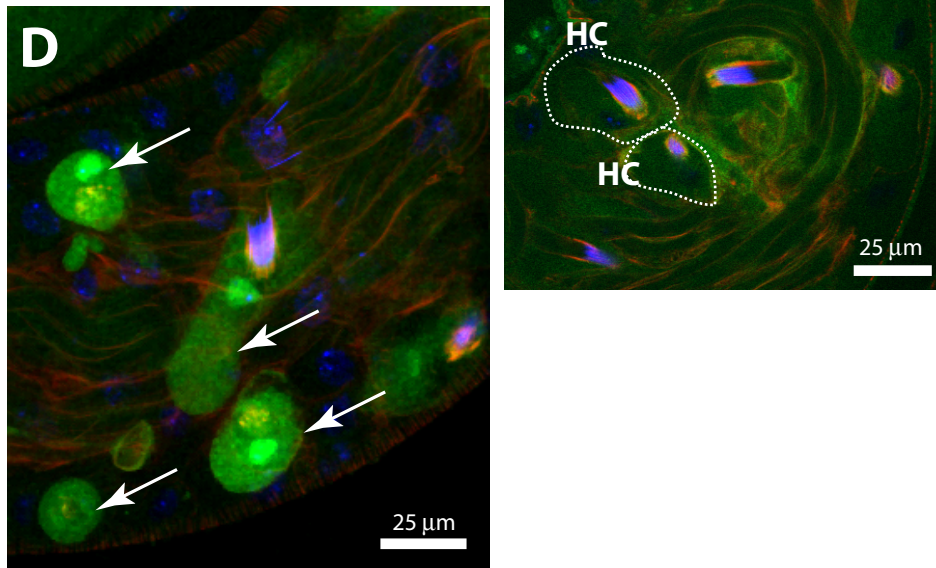

Supplement: 1741-7007-7-19-S3.pdf [file 1741-7007-7-19-S3.pdf]
