# Supplementary material for: F-actin-based extensions of the head cyst cell adhere to the maturing spermatids to maintain them in a tight bundle and prevent their premature release in Drosophila testis
Source: PubMed Central journal article supplement (PMC2683793; doi:10.1186/1741-7007-7-19), 2009-05-05

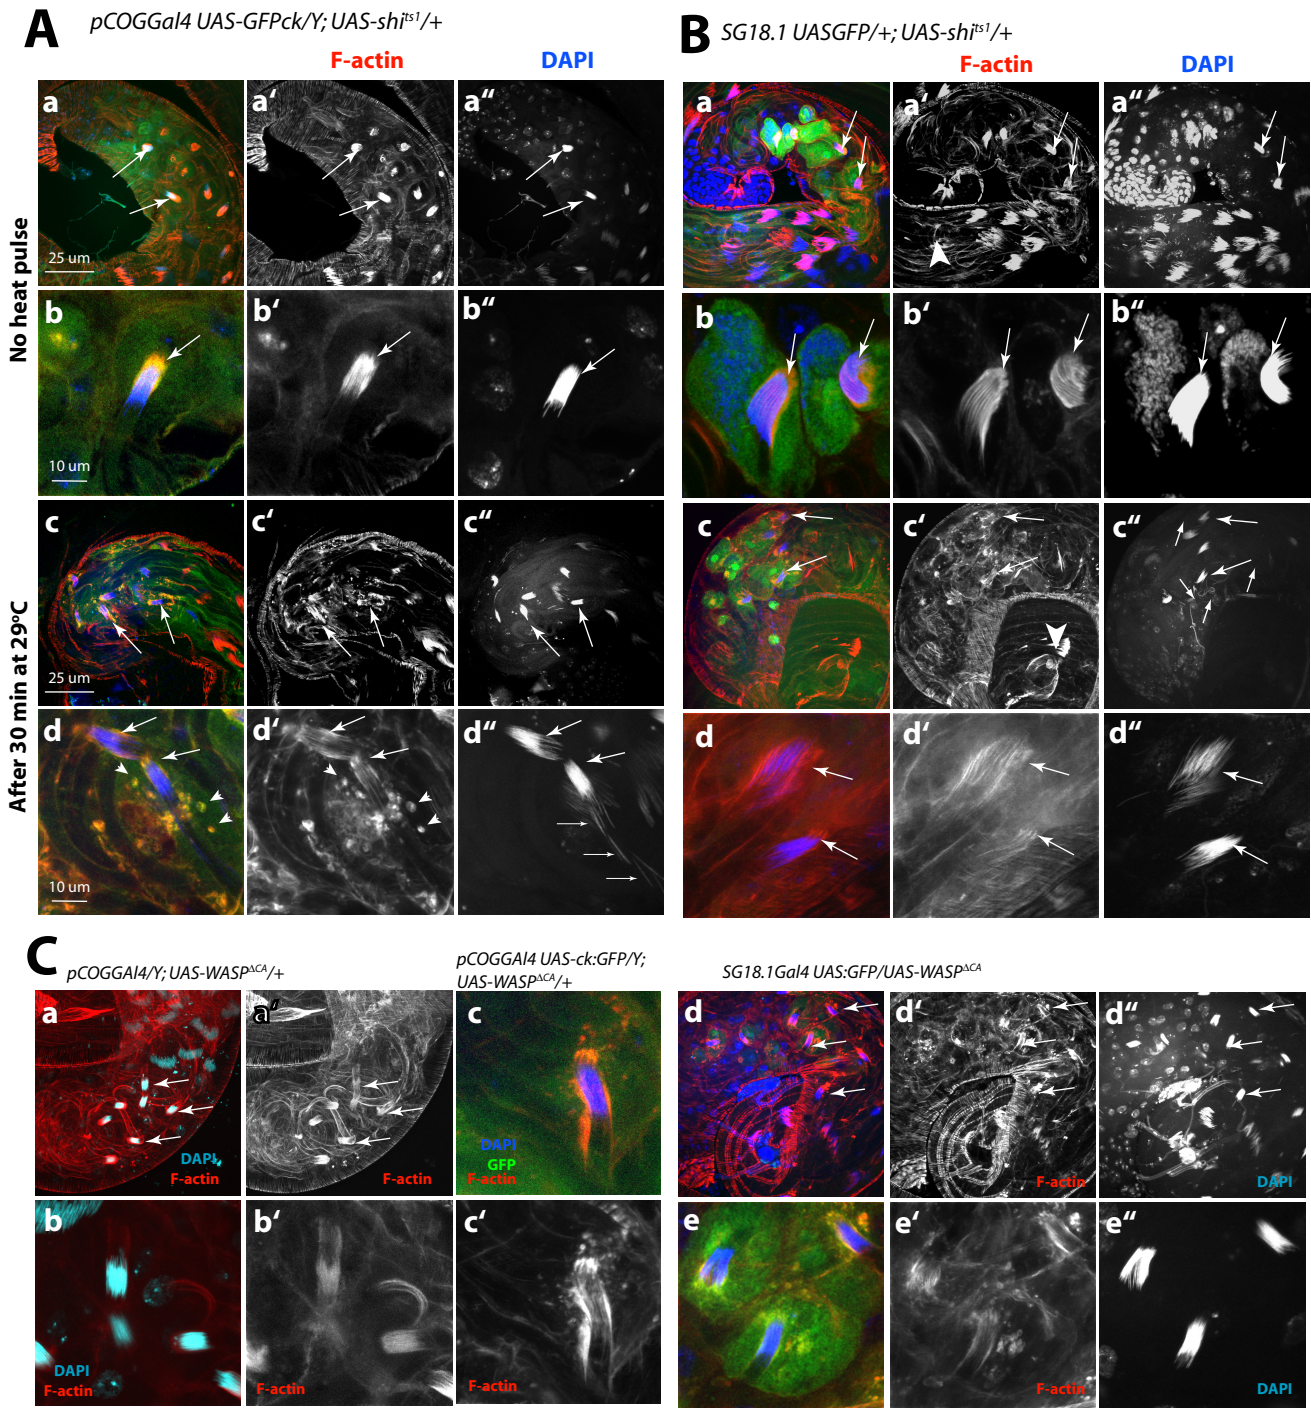

Supplement: 1741-7007-7-19-S5.pdf [file 1741-7007-7-19-S5.pdf]
